# Supplementary material for: Knowledge and practices regarding toxoplasmosis in housewives: A cross sectional study in a northern Mexican city
Source: PLoS One. 2019 Sep 9;14(9):e0222094. doi: 10.1371/journal.pone.0222094 (PMC6733448; doi:10.1371/journal.pone.0222094)
Supplement: S3 File — (XLSX) [file pone.0222094.s003.xlsx]

## Sheet: Hoja1
Number	Date	Place of recruitment	Age group 1: up to 30; 2: 31-50; 3: more than 50	1-Birthplace	2-Residence	3-Area	4-Education	5-Socioeconomic status	6-Years of seniority	7-Number of people	8-Raw meat tasting	9-Degree of meat cooking	10-Dried meat	11-Untreated water	12-Type of water	13-Wash hands	14-Wash fruits	15-Wash vegetables	16-Wear gloves	17-Wash knife	18-Freeze meat	19-Cats at kitchen	20-Dogs at kitchens	21-Birds at kitchen	22-Clean cat excrements	23-Know Toxoplasma	24-Know Toxoplasmosis	25-Know transmission	26-Know clinical features	27-Know Diagnosis	28-Know how to avoid	29-Know cat transmission	30-Transmission by food	31-Transmission by raw meat	32-Toxoplasma in meat	33-Freezing	34-Transmission by water	35-Transmission by fruits	36-Transplant	37-Transfusion	38-Cat excrements	39-Soil	40-Miscarriages	41-Fetus	42-Test in pregnancy	43-Vision	44-Prevalence in population	45-Treatment	46-Someone with Tg
1	2018-09-01	Home	1	1	1	2	4	2	7	4	2	2	1	2	2	4	4	4	4	4	2	3	3	2	2	2	2	2	2	2	2	3	3	3	3	3	3	3	3	3	3	3	3	3	3	3	2	3	2
2	2018-09-01	Home	2	1	1	2	4	1	23	6	2	3	2	2	2	4	4	4	1	4	1	3	3	2	2	2	2	2	2	2	2	3	3	3	3	3	3	3	2	3	3	3	3	3	3	3	2	3	2
3	2018-09-01	Home	1	1	1	1	2	2	2	2	2	3	1	2	3	4	4	4	4	4	2	3	3	2	2	2	2	2	2	2	2	3	3	3	3	3	3	3	3	3	3	3	3	3	3	3	2	2	2
4	2018-09-01	Home	2	1	1	1	4	2	10	4	2	3	1	2	2	4	4	4	2	4	2	3	3	2	2	2	2	2	2	2	2	3	3	3	3	3	3	3	3	3	3	3	3	3	3	3	2	2	2
5	2018-09-01	Home	2	2	1	1	4	2	10	4	2	3	1	2	2	4	4	4	1	3	1	3	3	2	2	2	2	2	2	2	2	3	3	3	3	3	3	3	3	3	3	3	3	3	3	3	2	3	2
6	2018-09-01	Home	3	1	1	1	1	2	22	8	2	2	1	2	2	4	4	4	1	3	1	3	3	2	2	2	2	2	2	2	2	2	3	3	3	3	3	3	3	3	3	3	3	3	2	3	2	3	2
7	2018-09-01	Home	3	1	1	2	2	2	28	6	2	3	1	2	3	4	4	4	1	2	1	3	3	2	2	2	2	2	2	2	2	2	3	3	3	3	3	3	3	3	3	3	3	3	3	3	2	3	2
8	2018-09-01	Home	2	2	1	1	4	2	3	3	2	3	1	2	2	4	4	4	4	4	4	3	3	2	2	2	2	2	2	2	2	3	3	3	3	3	3	3	3	3	3	3	3	3	2	3	2	3	2
9	2018-09-01	Home	1	1	1	1	4	2	11	4	2	3	1	2	2	4	4	4	1	4	1	3	3	2	2	2	2	2	2	2	2	3	3	3	3	3	3	3	3	3	3	3	3	3	2	3	2	3	2
10	2018-09-01	Home	1	2	1	1	2	2	3	2	2	3	1	2	2	4	4	4	4	4	2	3	3	2	2	2	2	2	2	2	2	3	3	3	3	3	3	3	3	3	3	3	3	3	3	3	2	3	2
11	2018-09-01	Home	2	1	1	1	4	2	2	2	2	3	1	2	2	4	4	4	1	4	4	2	2	2	1	2	2	2	2	2	2	2	3	3	3	3	3	3	3	3	3	3	3	3	2	3	2	2	2
12	2018-09-01	Home	1	1	1	1	3	2	1	3	2	3	1	2	2	4	4	3	1	4	2	2	2	2	2	2	2	1	2	2	1	1	2	2	2	2	2	2	2	2	1	1	1	1	1	1	2	2	2
13	2018-09-01	Home	2	1	1	1	3	2	20	4	2	3	1	2	2	4	4	4	4	4	4	3	3	2	2	1	2	1	2	2	1	1	3	3	3	3	3	3	3	3	1	1	3	3	2	3	2	3	2
14	2018-09-01	Home	2	1	1	1	4	2	2	1	1	3	2	2	2	4	2	4	1	4	4	2	1	2	2	2	2	1	2	1	2	1	1	1	1	1	1	3	2	2	1	1	1	1	2	1	2	1	2
15	2018-09-01	Home	1	1	1	1	4	2	3	2	2	3	1	2	2	4	4	4	1	4	4	2	2	2	2	2	2	2	2	2	2	1	1	1	1	3	1	1	1	1	1	1	1	1	2	1	2	2	2
16	2018-09-01	Home	2	1	1	1	3	2	30	4	2	3	1	2	2	4	4	4	1	4	4	2	2	2	2	2	2	2	2	2	2	3	3	3	3	3	3	3	3	3	3	3	3	3	3	3	2	3	2
17	2018-09-01	Home	3	1	1	1	2	1	50	6	1	2	2	1	1	3	3	3	1	4	3	3	1	1	1	2	2	2	2	2	2	3	3	3	3	3	3	3	3	3	3	3	3	3	3	3	2	2	2
18	2018-09-01	Home	2	1	1	1	3	2	5	2	1	2	3	1	3	4	4	4	1	4	3	1	1	2	1	2	2	2	2	2	2	3	3	3	3	3	3	3	3	3	3	3	3	3	2	3	2	2	2
19	2018-09-01	Home	2	1	1	1	4	2	3	2	2	3	1	2	2	4	4	4	1	4	1	3	3	2	2	1	2	1	1	1	2	1	3	3	3	3	3	3	3	3	1	1	1	1	2	1	2	3	2
20	2018-09-01	Home	1	1	1	2	2	2	1	3	1	2	2	2	2	4	4	4	1	4	2	2	2	2	2	2	2	2	2	2	2	3	3	3	3	3	3	3	3	3	3	3	3	3	2	3	2	2	2
21	2018-09-01	Home	1	1	1	3	3	2	30	4	1	2	2	2	2	4	4	4	1	4	1	2	2	2	2	2	2	2	2	2	2	1	3	3	3	3	3	3	3	3	3	3	3	3	3	3	2	3	2
22	2018-09-01	Home	3	1	1	3	3	2	40	2	2	3	1	2	2	4	4	4	1	4	4	2	2	2	2	2	2	2	2	2	2	1	1	3	3	3	3	3	3	3	1	1	1	1	1	3	2	3	2
23	2018-09-01	Home	2	1	1	3	2	2	28	4	2	3	1	2	2	4	4	4	1	4	1	3	2	2	2	2	1	1	1	2	1	1	1	2	3	3	3	3	3	3	3	3	1	3	3	1	2	2	2
24	2018-09-01	Home	3	1	1	1	3	2	36	4	2	3	2	2	2	4	4	4	4	1	4	2	2	2	2	2	2	2	2	2	2	2	3	3	3	3	3	3	3	3	3	3	3	3	2	3	2	2	2
25	2018-09-01	Home	2	1	1	1	3	2	30	4	2	3	1	2	2	4	4	4	1	4	4	2	2	2	1	2	2	1	2	2	2	1	2	1	2	2	2	2	1	2	1	1	3	3	3	1	2	1	2
26	2018-09-01	Home	3	1	1	1	4	2	40	4	2	3	1	2	2	4	4	4	1	4	1	3	3	2	2	2	2	1	2	2	2	1	1	2	3	3	3	3	3	3	1	2	3	3	2	1	2	3	2
27	2018-09-01	Home	1	1	1	1	3	2	2	2	2	3	1	2	2	3	2	4	1	4	3	3	3	2	2	2	2	2	2	2	2	2	3	3	3	3	3	3	3	3	3	3	3	3	3	3	2	3	2
28	2018-09-01	Home	3	1	1	1	4	2	37	4	2	3	1	2	2	4	3	3	1	4	4	3	1	2	2	2	2	2	2	2	2	3	3	3	3	3	3	3	3	3	3	3	3	3	3	3	2	3	2
29	2018-09-01	Home	1	1	1	2	3	2	3	3	2	3	1	2	2	2	4	4	1	4	1	2	3	2	2	2	2	2	2	2	2	3	3	3	3	3	3	3	3	3	3	3	3	3	3	3	2	3	2
30	2018-09-01	Home	2	1	1	1	4	2	10	4	2	3	2	2	2	4	4	4	1	4	3	3	2	2	1	2	2	2	2	2	2	3	3	3	3	3	3	3	3	3	3	3	3	3	4	3	2	3	2
31	2018-09-01	Home	1	1	1	1	4	2	3	5	2	3	1	2	2	4	4	4	1	4	2	3	2	2	2	2	2	2	2	2	2	3	3	3	3	3	3	3	3	3	3	3	3	3	2	3	2	3	2
32	2018-09-01	Home	1	1	1	3	3	2	1	2	2	3	1	2	2	4	4	4	1	4	2	3	2	2	2	2	2	2	2	2	2	3	3	3	3	3	3	3	3	3	3	3	3	3	2	3	2	3	2
33	2018-09-01	Home	2	1	1	3	3	2	18	4	2	3	1	2	2	4	4	4	1	4	2	3	2	2	2	2	2	2	2	2	2	3	3	3	3	3	3	3	3	3	3	3	3	3	2	3	2	3	2
34	2018-09-01	Home	2	1	1	3	4	2	22	6	2	3	1	2	2	4	4	4	1	4	2	3	2	2	2	2	2	2	2	2	2	3	3	3	3	3	3	3	3	3	3	3	3	3	2	3	2	3	2
35	2018-09-01	Home	2	1	1	1	3	2	5	4	2	3	1	2	2	2	2	2	1	2	1	3	3	2	2	2	2	2	2	2	2	3	3	3	3	3	3	3	3	3	3	3	3	3	4	3	2	3	2
36	2018-09-01	Home	2	1	1	1	3	2	9	4	2	3	1	2	2	2	2	2	1	3	1	3	3	2	2	2	2	2	2	2	2	3	3	3	3	3	3	2	2	3	3	3	3	2	2	3	2	2	2
37	2018-09-01	Home	1	1	1	1	4	2	10	4	2	3	1	2	2	3	3	3	1	3	1	3	3	2	2	2	2	2	2	2	2	3	3	3	2	3	2	1	3	3	2	3	2	3	2	3	2	3	2
38	2018-09-01	Home	3	1	1	1	3	2	38	4	2	3	1	2	3	4	4	4	4	4	4	3	1	2	2	2	2	2	2	2	2	3	3	3	3	3	3	3	3	3	3	3	3	3	2	3	2	3	2
39	2018-09-01	Home	3	1	1	1	3	2	50	2	2	3	2	2	3	4	4	4	4	4	4	3	3	2	2	2	2	2	2	2	2	3	3	3	3	3	3	3	3	3	3	3	3	3	2	3	2	3	2
40	2018-09-01	Home	2	1	1	1	4	2	26	6	2	3	1	2	2	4	4	4	1	4	4	3	2	2	2	2	2	1	1	2	1	1	1	1	1	2	3	3	3	3	3	3	3	3	2	3	2	3	2
41	2018-09-01	Home	3	1	3	1	3	2	27	5	2	3	1	2	2	4	4	4	4	4	4	2	2	2	2	2	2	2	2	2	2	3	3	3	3	3	3	3	3	3	3	3	3	3	2	3	2	3	2
42	2018-09-01	Home	3	1	1	1	3	2	32	2	2	3	1	2	2	4	4	4	1	4	4	3	2	2	2	2	2	2	2	2	2	3	3	3	3	3	3	3	3	3	3	3	3	3	3	3	2	3	2
43	2018-09-01	Home	3	2	1	1	3	2	37	4	2	3	1	2	2	4	4	4	1	4	3	3	3	2	2	2	2	2	2	2	2	2	3	3	3	3	3	3	3	3	3	1	3	3	3	2	2	3	2
44	2018-09-01	Home	1	1	1	1	3	2	8	4	2	3	1	2	2	2	2	2	2	2	1	3	3	2	2	2	2	2	2	2	2	3	3	3	3	3	3	3	3	3	3	3	3	3	3	3	2	3	2
45	2018-09-01	Home	3	1	1	1	2	2	33	3	2	2	1	2	2	4	4	4	1	4	4	3	3	2	2	2	2	2	2	2	2	3	3	3	3	3	3	3	3	3	3	3	3	3	2	3	2	3	2
46	2018-09-01	Home	1	1	1	1	4	2	6	2	2	2	1	2	2	3	3	3	1	3	1	3	3	2	2	2	2	2	2	2	2	2	3	3	3	3	3	3	3	3	3	3	3	3	3	3	2	3	2
47	2018-09-01	Home	2	1	1	1	3	2	26	7	2	2	1	2	2	4	4	4	1	3	1	3	3	2	2	2	2	2	2	2	2	3	3	3	3	3	3	3	3	3	3	3	3	3	3	3	2	3	2
48	2018-09-01	Home	1	2	1	1	1	2	2	6	2	2	2	1	2	2	4	4	4	4	3	1	3	2	2	2	2	2	2	2	2	2	2	3	3	3	3	3	3	3	3	3	3	3	3	3	2	3	2
49	2018-09-01	Home	2	1	1	2	4	3	15	5	2	3	2	2	2	4	4	4	1	1	4	2	2	2	2	2	2	2	2	2	2	2	2	2	2	3	3	3	3	3	3	3	3	3	3	3	2	3	2
50	2018-09-01	Home	1	1	1	1	3	2	4	4	2	3	1	2	2	4	4	4	1	4	2	2	1	2	1	2	2	2	2	2	2	2	3	3	3	3	3	3	3	3	3	3	3	3	4	3	2	3	2
51	2018-09-01	Home	1	1	1	1	4	2	3	3	2	3	1	2	2	4	4	4	1	4	2	3	3	2	2	2	2	2	2	2	2	1	3	3	3	3	3	3	3	3	1	1	3	3	1	3	2	3	2
52	2018-09-01	Home	1	1	1	1	2	2	2	2	2	3	1	2	3	2	3	4	1	2	1	3	3	2	2	2	2	2	2	2	2	3	3	3	3	3	3	3	3	3	3	3	3	3	4	3	2	3	2
53	2018-09-01	Home	2	1	1	1	3	2	3	3	2	3	1	2	2	4	4	4	4	1	4	2	1	2	1	2	2	1	2	2	1	1	2	2	3	3	2	2	2	2	1	1	3	3	2	1	2	2	2
54	2018-09-01	Home	3	1	1	1	1	1	46	5	2	3	1	1	3	4	4	4	4	1	2	2	2	2	2	2	2	2	2	2	2	3	3	3	3	3	3	3	3	3	3	3	3	3	2	2	2	2	2
55	2018-09-01	Home	2	1	1	1	3	2	4	3	2	3	1	2	2	4	4	4	4	1	4	2	2	2	2	2	2	2	2	2	2	3	3	3	3	3	3	3	3	3	3	3	3	3	2	3	2	3	2
56	2018-09-01	Home	2	2	1	1	4	2	14	5	2	3	1	2	2	4	4	4	4	2	4	1	2	2	1	1	1	1	1	1	1	1	1	1	1	2	1	1	2	2	1	1	1	1	2	1	2	2	2
57	2018-09-01	Home	2	2	1	1	4	2	10	4	2	3	1	2	2	4	4	4	1	4	3	2	2	2	2	1	2	1	2	2	1	1	1	1	1	1	1	1	3	3	1	1	3	3	2	3	2	2	2
58	2018-09-01	Home	2	1	1	1	4	2	10	3	2	3	1	2	2	4	4	4	1	4	4	2	2	2	2	1	2	1	1	1	1	1	1	1	1	1	1	1	3	1	1	1	3	3	2	1	2	1	2
59	2018-09-01	Home	3	1	1	1	1	1	30	6	2	3	1	1	1	2	3	3	1	4	1	2	2	2	2	2	2	2	2	2	2	3	3	3	3	3	3	3	3	3	3	3	3	3	2	3	2	3	2
60	2018-09-01	Home	2	1	1	1	3	2	6	3	2	3	1	2	2	4	4	4	1	4	3	3	1	2	1	2	2	1	2	2	1	1	2	2	2	2	2	2	2	2	1	1	3	3	2	1	2	2	2
61	2018-09-01	Home	1	1	1	1	4	2	3	3	2	3	3	2	2	4	4	4	1	4	4	3	1	2	2	2	2	2	2	2	2	2	3	3	3	3	3	3	3	3	3	3	3	3	4	3	2	3	2
62	2018-09-01	Home	3	1	1	1	4	2	34	2	2	3	1	2	2	4	4	4	1	4	2	3	2	2	1	1	1	1	1	2	1	1	1	1	1	2	1	1	1	2	1	1	1	1	4	1	1	1	1
64	2018-07-01	Clinic	2	1	1	1	3	2	36	2	2	3	1	2	2	4	4	4	2	4	1	3	3	2	2	2	2	2	2	2	2	3	3	3	1	3	1	3	3	3	1	1	3	3	3	3	2	3	2
65	2018-07-01	Clinic	2	1	1	1	4	2	25	6	2	3	1	1	1	2	4	4	1	1	3	3	3	2	2	2	2	2	2	2	2	3	3	3	3	3	3	3	3	3	3	3	3	3	4	3	2	3	2
66	2018-07-01	Clinic	3	1	1	1	3	2	29	3	2	3	1	2	2	4	4	4	1	4	2	3	3	2	2	2	2	2	2	2	2	3	3	1	1	1	3	1	2	2	1	2	3	2	2	2	2	3	2
67	2018-07-01	Clinic	2	1	1	1	3	2	58	6	2	3	1	2	2	4	4	4	1	2	2	3	3	2	2	2	2	2	2	2	2	2	2	3	3	3	3	3	3	3	3	3	3	3	2	3	2	3	2
68	2018-07-01	Clinic	2	1	1	1	4	2	25	5	2	3	1	2	2	4	4	4	1	2	1	3	3	2	2	2	2	2	2	2	2	2	2	3	3	3	3	3	3	3	3	3	3	3	2	3	2	3	2
69	2018-07-01	Clinic	3	1	1	1	3	2	20	2	2	3	1	1	1	4	4	4	1	4	3	3	3	2	2	2	2	2	2	2	2	3	3	3	3	3	3	3	3	3	3	3	3	3	3	3	2	2	2
70	2018-07-01	Clinic	2	1	1	1	3	2	2	4	2	3	1	2	2	4	4	4	1	4	1	2	3	2	2	2	2	2	2	2	2	3	3	3	3	3	3	3	3	3	3	3	3	3	2	3	2	3	2
71	2018-07-01	Clinic	2	1	1	1	4	2	26	6	2	3	1	2	2	3	4	4	1	4	1	3	2	2	1	2	2	2	2	2	2	3	3	3	3	2	3	3	3	3	3	3	3	3	4	3	2	3	2
74	2018-07-01	Clinic	3	1	1	1	3	2	15	7	2	3	1	2	2	3	4	4	2	3	2	3	3	2	2	2	2	2	2	2	2	3	3	3	3	3	3	3	3	3	3	3	3	3	4	3	2	3	2
75	2018-07-01	Clinic	2	2	1	1	3	2	22	5	2	3	1	1	1	3	4	4	1	2	3	3	3	2	2	1	2	2	2	2	2	3	3	3	3	3	3	3	3	3	3	3	3	3	4	3	2	3	2
76	2018-07-01	Clinic	2	2	1	1	4	2	10	4	2	3	1	2	2	4	4	4	4	4	2	3	3	2	2	1	1	1	2	1	1	1	3	1	1	1	3	1	3	3	1	1	3	3	2	3	2	3	2
77	2018-07-01	Clinic	1	2	2	1	4	2	9	2	2	2	2	2	3	4	4	4	2	4	2	2	2	2	1	2	2	2	2	2	2	2	3	3	3	3	3	3	3	3	3	3	3	3	4	3	2	3	2
78	2018-07-01	Clinic	2	1	1	1	4	2	7	2	2	3	1	2	2	4	4	4	2	3	2	3	2	2	2	1	2	1	2	1	1	1	3	1	1	3	3	1	3	3	1	3	1	1	3	1	2	3	2
80	2018-07-01	Clinic	1	1	1	1	4	2	12	4	2	3	1	2	2	4	4	4	4	4	1	3	2	2	2	2	2	2	2	2	2	2	2	3	3	3	3	3	3	3	3	3	3	3	3	3	2	3	2
81	2018-07-01	Clinic	1	1	1	1	3	2	8	3	2	3	1	2	2	4	4	4	4	4	1	3	3	2	2	2	2	2	2	2	2	2	2	2	2	2	3	3	3	3	3	3	3	3	3	3	2	3	2
82	2018-07-01	Clinic	2	1	1	1	4	2	11	3	2	3	1	2	2	4	4	4	1	4	1	3	2	2	2	2	2	2	2	2	2	2	2	2	3	3	3	3	3	3	3	3	3	3	3	2	2	3	2
83	2018-07-01	Clinic	2	1	1	1	4	2	25	4	2	3	1	2	2	4	4	4	1	4	3	1	3	2	1	2	2	2	2	2	2	3	3	3	3	3	3	3	3	3	3	3	3	3	2	3	2	3	2
85	2018-07-01	Clinic	2	1	1	1	4	2	30	7	2	3	1	2	2	4	4	4	4	4	1	3	2	2	2	2	2	2	2	2	2	3	3	3	3	3	3	3	3	3	3	3	3	3	2	3	2	3	2
86	2018-07-01	Clinic	2	1	1	1	3	2	40	4	2	3	1	2	2	4	4	4	1	4	1	3	3	2	2	2	2	2	2	2	2	3	3	3	3	3	3	3	3	3	3	3	3	3	3	3	2	3	2
87	2018-07-01	Clinic	3	1	1	1	3	2	42	4	2	3	1	2	4	4	4	4	1	4	3	3	2	2	2	2	2	2	2	2	2	3	3	3	3	3	3	3	3	3	3	3	3	3	2	3	2	3	2
88	2018-07-01	Clinic	2	1	1	1	4	2	14	1	2	3	1	2	2	4	4	4	1	2	1	3	3	2	2	2	2	2	2	2	2	3	3	3	3	3	3	3	3	3	3	3	3	3	3	3	2	3	2
89	2018-07-01	Clinic	2	2	1	1	4	2	11	2	2	3	1	2	2	3	3	3	1	4	4	3	1	1	2	2	2	2	2	2	2	3	3	3	3	3	3	3	3	3	3	3	3	3	3	3	2	3	2
90	2018-07-01	Clinic	3	1	1	1	3	2	8	4	2	3	1	2	2	4	4	4	1	4	1	3	2	2	2	2	2	2	2	2	2	3	3	3	3	3	3	3	3	3	3	3	3	3	4	3	2	3	2
91	2018-07-01	Clinic	2	1	1	1	3	2	1	2	2	3	1	2	2	4	4	4	1	4	2	2	3	2	2	2	2	2	2	2	2	3	3	3	3	3	3	3	3	3	3	3	3	3	4	3	2	3	2
92	2018-07-01	Clinic	2	1	1	1	4	2	2	3	2	3	2	2	2	4	4	4	1	4	3	3	2	2	2	2	2	2	2	2	2	3	3	3	3	3	3	3	3	3	3	3	3	3	2	3	2	1	2
93	2018-07-01	Home	1	1	1	2	3	2	2	2	2	3	1	2	2	4	4	4	1	4	2	2	2	2	2	2	2	2	2	2	2	1	2	1	1	3	1	1	3	3	1	1	3	3	2	1	2	2	2
94	2018-08-01	School	1	1	1	1	3	2	10	4	2	3	1	2	2	4	4	4	1	4	1	3	2	2	2	1	1	1	2	2	1	1	1	1	1	2	1	1	2	2	1	1	1	1	2	1	2	2	2
95	2018-08-01	School	2	2	1	1	4	2	23	3	2	3	1	2	2	4	4	4	1	2	4	3	2	2	2	2	2	2	2	2	2	3	3	3	3	3	3	3	3	3	3	3	3	3	3	3	2	3	2
96	2018-08-01	School	2	1	1	1	4	2	11	5	2	3	1	2	2	4	4	4	1	2	4	2	2	1	1	2	2	2	2	2	2	3	3	3	3	3	3	3	3	3	3	3	3	3	2	3	2	3	2
97	2018-08-01	School	2	1	1	1	4	2	25	4	2	3	1	2	2	4	4	4	1	4	3	3	2	2	2	2	2	2	2	2	2	3	3	3	3	3	3	3	3	3	3	3	3	3	2	3	2	3	2
98	2018-08-01	School	2	1	1	1	4	2	7	4	2	3	1	2	2	4	4	4	2	3	2	3	2	2	2	2	2	1	2	2	2	1	2	2	2	2	2	2	2	2	2	2	2	2	2	2	2	2	2
99	2018-08-01	School	2	1	1	1	4	2	5	4	2	3	1	2	2	4	4	3	1	2	3	3	3	2	2	2	2	2	2	2	2	3	3	3	3	3	3	3	3	3	3	3	3	3	2	3	2	3	2
100	2018-08-01	School	3	1	1	1	4	2	30	6	2	3	1	2	2	4	3	3	1	1	3	3	3	2	2	2	2	2	2	2	2	3	3	3	3	3	3	3	3	3	3	3	3	3	2	3	2	3	2
101	2018-08-01	School	3	1	1	1	2	2	55	3	2	3	1	2	2	4	4	4	1	4	4	3	1	2	2	2	2	2	2	2	2	3	3	3	3	3	3	3	3	3	3	3	3	3	3	3	2	3	2
102	2018-08-01	School	2	2	1	1	4	2	7	3	2	3	2	2	2	4	4	4	1	4	2	3	1	2	2	1	1	1	1	1	1	1	1	1	1	1	1	1	3	1	1	3	1	1	1	2	1	2	2
103	2018-08-01	School	2	1	1	1	4	2	19	5	2	3	1	1	1	4	3	3	1	2	3	3	2	2	2	2	2	2	2	2	2	3	3	3	3	3	3	3	3	3	3	3	3	3	2	3	2	3	2
104	2018-08-01	School	3	2	1	3	3	2	40	3	2	3	1	1	2	4	4	4	1	4	2	2	2	2	2	2	2	2	2	2	2	1	2	1	3	3	1	2	3	3	1	1	3	3	2	3	2	3	2
105	2018-08-01	School	2	1	1	1	3	1	23	7	2	3	1	2	2	4	4	4	1	4	1	3	3	2	1	2	2	2	2	2	2	3	3	3	3	3	3	3	3	3	3	3	3	3	2	3	2	3	2
106	2018-08-01	School	2	1	1	1	3	2	10	4	2	3	3	2	2	4	4	1	4	4	4	2	2	2	1	2	2	2	2	2	2	3	3	3	3	3	3	3	3	3	3	3	3	3	3	3	2	3	2
107	2018-08-01	School	1	1	1	1	3	2	5	5	2	3	1	1	1	4	3	3	1	3	2	3	1	2	2	1	1	2	2	2	2	1	2	1	1	3	3	1	3	3	1	3	3	1	2	3	2	3	2
108	2018-08-01	School	1	1	1	1	3	1	11	4	2	3	2	2	2	4	4	4	2	4	4	3	3	2	2	2	2	2	2	2	2	3	3	3	3	3	3	3	3	3	3	3	3	3	3	3	2	3	2
109	2018-08-01	School	2	1	1	3	3	2	7	4	2	3	3	2	2	4	4	4	1	4	4	3	2	2	2	2	2	2	2	2	2	3	3	3	3	3	3	3	3	3	1	3	3	3	2	3	2	3	2
110	2018-08-01	School	1	1	1	1	3	2	1	4	2	3	1	2	2	4	4	4	2	4	4	1	1	2	1	2	2	2	2	2	2	3	3	3	3	3	3	3	3	3	3	3	3	3	3	3	2	3	2
111	2018-08-01	School	1	1	1	2	3	2	10	5	2	3	1	1	1	4	4	4	1	4	1	2	2	2	1	2	2	2	2	2	2	3	3	3	3	3	3	3	3	3	3	3	3	3	2	3	2	3	2
112	2018-08-01	School	2	1	1	1	3	2	17	5	2	3	2	2	1	4	4	4	1	4	3	3	1	2	2	2	2	2	2	2	2	3	3	1	1	3	3	3	3	3	1	1	3	3	3	3	2	3	2
113	2018-08-01	School	2	1	1	1	2	2	10	5	2	3	1	2	1	3	4	4	1	4	1	3	2	2	2	1	1	2	1	2	2	1	2	1	1	1	1	1	1	1	1	3	1	1	2	3	2	3	2
114	2018-08-01	School	2	1	1	1	3	2	19	5	2	3	1	2	2	4	4	4	1	4	1	3	2	2	2	2	2	2	2	2	2	3	3	3	3	3	3	3	3	3	3	3	3	3	3	3	2	3	2
115	2018-08-01	School	2	1	1	2	3	2	11	4	2	3	1	2	4	4	4	3	1	4	2	3	2	2	2	2	2	2	2	2	2	3	3	1	1	3	3	3	1	1	1	3	1	1	2	1	2	2	2
116	2018-08-01	School	3	1	1	1	3	2	35	6	2	3	1	2	1	4	4	4	1	4	1	3	2	2	2	1	1	1	2	1	1	1	1	1	1	3	3	3	1	1	1	1	1	1	2	3	2	2	2
117	2018-08-01	School	2	1	1	1	3	2	10	3	2	3	1	1	1	3	4	4	1	4	1	3	3	2	2	2	2	2	2	2	2	3	3	3	3	3	3	3	3	3	3	3	3	3	2	3	2	3	2
118	2018-08-01	School	1	1	1	2	3	2	13	5	2	3	1	2	2	4	4	4	1	4	2	2	1	2	1	2	2	2	2	2	2	3	3	3	3	3	3	3	3	3	3	3	3	3	3	3	2	3	2
119	2018-08-01	School	1	1	1	1	3	2	12	5	2	3	1	1	2	3	2	4	1	3	1	3	2	2	2	1	1	1	2	2	2	2	2	1	1	1	3	2	1	1	1	2	1	1	2	1	2	2	2
120	2018-08-01	School	2	1	1	1	4	2	14	4	1	3	2	1	2	2	4	4	4	1	4	2	2	2	2	2	2	2	2	2	2	3	3	3	3	3	3	3	3	3	3	3	3	3	2	3	2	3	2
121	2018-08-01	School	2	1	1	1	3	2	10	5	2	3	2	2	2	4	4	4	2	4	4	3	2	2	2	2	2	2	2	2	2	3	3	3	1	1	1	1	2	2	1	1	1	1	2	1	2	3	2
122	2018-08-01	School	2	1	1	1	3	1	20	4	2	3	1	1	1	4	4	4	3	4	4	3	3	2	2	2	2	2	2	2	2	3	3	3	3	3	3	3	3	3	3	3	3	3	3	3	2	3	2
123	2018-08-01	School	2	1	1	1	3	2	18	5	2	3	2	2	2	4	4	4	2	4	4	3	3	2	2	2	2	2	2	2	2	1	3	1	3	3	3	3	3	3	3	3	3	3	2	3	2	3	2
124	2018-08-01	School	2	1	1	1	4	2	20	2	2	3	1	2	2	4	4	4	1	4	4	1	1	2	1	1	1	1	1	2	1	1	1	1	1	3	1	2	3	3	1	3	3	3	2	3	2	3	2
125	2018-08-01	School	2	1	1	1	3	2	15	7	2	3	1	2	2	4	4	4	1	4	1	2	2	2	1	2	2	2	2	2	2	3	3	3	3	3	3	3	3	3	3	3	3	3	2	3	2	3	2
126	2018-08-01	School	1	1	1	1	3	2	11	4	2	3	1	2	2	4	4	4	2	3	2	1	2	2	1	2	2	2	2	2	2	3	3	3	3	3	3	3	3	3	3	3	3	3	2	3	2	3	2
127	2018-08-01	School	1	1	1	1	3	2	5	6	2	3	1	2	2	4	3	4	1	3	2	3	3	2	2	2	2	2	2	2	2	3	3	3	3	3	3	3	3	3	3	3	3	3	2	3	2	3	2
128	2018-08-01	School	3	1	1	1	3	2	40	10	1	3	1	1	2	4	4	4	2	4	1	3	3	2	2	2	2	2	2	2	2	3	2	3	3	3	3	3	3	3	3	3	3	3	2	3	2	3	2
129	2018-08-01	School	1	1	1	1	3	1	9	5	2	3	2	2	2	3	4	4	1	4	4	3	3	2	2	2	2	2	2	2	2	3	3	3	3	3	3	1	3	3	3	3	3	3	3	3	2	3	2
130	2018-08-01	School	2	1	1	1	3	2	14	6	2	3	1	2	2	4	4	4	1	4	3	3	3	2	2	2	2	2	2	2	2	3	3	3	3	3	3	3	3	3	3	3	3	3	2	3	2	3	2
131	2018-08-01	School	2	2	1	1	3	2	16	5	2	3	1	2	2	4	4	4	1	4	1	3	3	2	2	2	2	2	2	2	2	3	3	3	3	3	3	3	3	3	3	3	3	3	2	3	2	3	2
132	2018-08-01	School	1	1	1	1	2	2	11	5	2	3	3	2	2	4	4	4	1	4	1	2	2	2	2	2	2	2	2	2	2	1	2	1	3	3	3	3	3	3	3	3	1	1	2	3	2	3	2
133	2018-10-01	Clinic	2	1	2	1	2	2	23	1	2	2	1	1	2	4	4	4	1	4	4	3	2	2	2	2	2	2	2	2	2	3	3	3	3	3	1	1	1	1	1	1	1	1	2	1	2	3	2
134	2018-10-01	Clinic	1	1	1	1	3	2	33	5	2	3	1	1	2	4	4	4	1	4	1	3	3	2	2	2	2	2	2	2	2	3	3	3	3	3	3	3	3	3	3	3	3	3	4	3	2	3	2
135	2018-10-01	Clinic	2	1	1	1	4	2	7	2	2	3	2	2	2	4	4	4	2	4	3	2	1	2	1	2	2	2	2	2	2	3	3	3	3	3	3	3	3	3	3	3	3	3	4	3	2	3	2
136	2018-10-01	Clinic	2	1	1	2	3	2	12	5	2	3	1	2	2	4	4	4	1	4	3	3	3	2	2	2	2	2	2	2	2	3	3	3	3	3	3	3	3	3	3	3	3	3	3	3	2	3	2
137	2018-10-01	Clinic	3	3	2	2	2	2	30	4	2	3	1	2	1	4	4	4	1	4	1	1	2	2	1	2	2	2	2	2	2	3	3	3	3	3	1	1	3	3	3	3	3	3	1	3	2	3	2
138	2018-10-01	Clinic	3	1	1	1	4	2	20	2	1	3	2	2	2	3	3	4	1	4	4	3	1	2	2	2	2	2	2	2	2	1	2	1	1	3	1	1	3	3	1	1	3	3	2	3	2	3	2
139	2018-10-01	Clinic	1	2	1	1	2	2	6	3	2	3	1	1	2	4	4	4	4	4	1	2	2	2	1	2	2	2	2	2	2	3	2	3	3	3	3	2	3	3	3	3	3	3	3	3	2	3	2
140	2018-10-01	Clinic	2	1	1	1	1	2	27	2	2	3	1	2	1	4	4	4	1	4	1	1	2	1	1	1	1	1	1	2	1	1	3	1	1	3	3	1	3	3	1	3	1	3	2	3	2	3	2
141	2018-10-01	Clinic	3	1	3	1	3	2	32	6	2	3	1	2	2	4	4	4	1	4	2	3	3	2	2	2	2	2	2	2	2	3	3	3	3	3	3	3	3	3	3	3	3	3	3	3	2	3	2
142	2018-10-01	Clinic	3	1	1	3	2	1	45	6	2	3	1	1	1	4	4	4	1	4	4	3	3	2	2	2	2	2	2	2	2	1	3	3	3	3	3	3	3	3	3	3	3	3	3	3	2	3	2
143	2018-10-01	Clinic	2	1	1	1	3	2	10	4	2	3	1	2	2	4	4	4	1	4	4	3	2	2	2	2	2	2	2	2	2	3	3	3	3	1	3	3	3	3	3	3	3	3	3	3	2	3	2
144	2018-10-01	Clinic	2	1	1	1	3	2	5	1	2	3	1	2	2	4	4	4	3	4	3	3	3	2	2	2	2	2	2	2	2	3	3	3	3	3	1	1	3	3	3	3	3	3	2	3	2	3	2
145	2018-10-01	Clinic	2	1	1	1	3	2	10	5	2	3	1	2	2	4	4	4	1	4	4	3	2	2	2	2	2	2	2	2	2	3	3	3	3	3	3	3	3	3	3	3	3	3	2	3	2	3	2
146	2018-10-01	Clinic	1	1	1	1	3	2	5	4	2	3	2	2	2	4	4	4	1	2	3	3	2	2	2	2	2	2	2	2	2	3	3	3	3	3	3	3	3	3	3	3	3	3	2	3	2	3	2
147	2018-10-01	Clinic	2	1	1	1	4	2	15	3	2	3	2	2	2	4	4	4	1	4	2	3	3	2	2	2	2	2	2	2	2	3	3	3	3	3	3	3	3	3	3	3	3	3	3	3	2	3	2
148	2018-10-01	Clinic	2	1	1	1	3	2	9	4	2	3	3	1	1	4	4	4	1	4	4	3	3	2	1	2	2	2	2	2	2	3	3	3	3	3	3	3	3	3	3	3	3	3	2	3	2	3	2
149	2018-10-01	Clinic	2	1	1	1	4	2	15	4	2	3	1	2	2	4	4	4	1	4	1	3	1	2	2	2	2	2	2	2	2	3	3	3	3	3	3	3	3	3	3	3	3	3	2	3	2	3	2
150	2018-10-01	Clinic	2	1	1	1	4	2	5	3	2	3	1	2	2	4	4	4	1	4	2	3	3	2	2	1	1	1	1	1	1	1	3	1	3	3	2	3	1	2	1	1	1	1	2	1	2	1	2
151	2018-10-01	Clinic	3	1	1	1	3	2	35	5	2	3	1	2	2	4	4	4	1	4	1	3	2	2	2	2	2	2	2	2	2	3	3	3	3	3	3	3	3	3	3	3	3	3	3	3	2	3	2
152	2018-10-01	Clinic	2	2	1	1	3	2	27	4	2	3	1	2	1	4	4	4	1	4	4	3	2	2	2	2	2	2	2	2	2	3	3	3	3	3	3	3	3	2	3	1	3	3	2	3	2	3	2
153	2018-10-01	Clinic	2	1	1	1	3	2	26	2	2	3	1	2	2	4	4	4	1	3	2	3	2	2	2	2	2	2	2	2	2	3	3	3	3	3	3	3	3	3	3	3	3	3	2	3	2	3	2
154	2018-10-01	Clinic	2	1	1	1	4	2	14	6	2	3	1	2	2	4	4	4	1	4	2	2	3	2	1	2	2	2	2	2	2	3	3	3	3	3	3	3	3	3	3	3	3	3	2	3	2	3	2
155	2018-10-01	Clinic	3	1	1	1	3	2	25	2	2	3	1	2	2	4	4	4	2	3	1	3	2	2	2	2	2	2	2	2	2	3	3	3	3	3	3	3	3	3	3	3	3	3	2	3	2	3	2
156	2018-10-01	Clinic	2	2	1	1	4	2	6	3	2	3	1	2	2	4	4	4	4	4	4	3	3	2	2	2	2	2	2	2	2	3	3	3	3	3	3	3	3	3	3	3	3	3	3	3	2	3	2
157	2018-10-01	Clinic	2	1	1	1	4	2	11	3	2	3	1	2	2	4	4	4	4	4	1	3	3	2	2	2	2	2	2	2	2	2	2	3	3	3	3	3	3	3	3	3	3	3	3	3	2	3	2
158	2018-10-01	Clinic	3	1	1	1	3	2	35	5	2	3	1	2	2	4	4	4	4	4	1	3	3	2	2	2	2	2	2	2	2	3	3	3	3	3	3	3	3	3	3	3	3	3	3	3	2	3	2
159	2018-10-01	Clinic	2	1	1	1	4	2	14	5	2	3	1	2	2	4	4	4	4	4	4	3	3	2	2	2	2	2	2	2	2	3	3	3	3	3	3	3	3	3	3	3	3	3	3	3	2	3	2
160	2018-10-01	Clinic	3	1	1	1	3	2	25	6	2	3	1	2	2	4	4	4	1	4	1	3	3	2	2	2	2	2	2	2	2	3	3	3	3	3	3	3	3	3	3	3	3	3	3	3	2	3	2
161	2018-10-01	Clinic	2	1	1	1	1	2	24	5	2	3	1	2	2	4	4	4	1	4	1	2	2	2	2	2	2	2	2	2	2	3	3	3	3	3	3	3	3	3	3	3	3	3	2	3	2	3	2
162	2018-10-01	Clinic	3	1	1	1	3	2	16	4	2	3	1	2	2	4	4	4	1	4	1	3	2	2	2	2	2	2	2	2	2	3	3	3	3	3	3	3	3	3	3	3	3	3	3	3	2	3	2
163	2018-10-01	Clinic	3	1	1	1	3	2	4	3	2	3	1	2	2	3	2	3	1	3	4	3	2	2	2	2	2	2	2	2	2	3	3	3	3	3	3	3	3	3	3	3	3	3	2	3	2	3	2
164	2018-10-01	Clinic	3	1	1	1	3	2	38	5	2	3	1	2	2	4	4	4	1	4	2	3	3	2	2	2	2	2	2	2	2	3	3	3	3	3	3	3	3	3	3	3	3	3	2	3	2	3	2
165	2018-10-01	Clinic	2	1	1	1	3	2	3	5	2	3	1	2	2	4	4	4	1	4	3	3	3	2	2	2	2	2	2	2	2	3	3	3	3	3	3	3	3	3	3	3	3	3	2	3	2	3	2
166	2018-10-01	Clinic	2	1	1	1	3	2	12	4	2	3	1	2	2	4	4	4	1	4	1	3	2	2	1	2	2	2	2	2	2	3	3	3	3	3	3	3	3	3	3	3	3	3	2	3	2	3	2
167	2018-10-01	Clinic	2	1	1	1	3	2	15	5	2	3	3	2	2	3	3	4	2	2	3	3	1	2	2	2	2	2	2	2	2	3	3	3	3	3	3	3	3	3	3	3	3	3	3	3	2	3	2
168	2018-10-01	Clinic	2	1	1	1	3	2	38	3	2	3	1	2	2	4	4	4	2	4	2	3	1	2	2	2	1	2	2	2	2	1	3	3	3	3	3	3	3	3	1	1	1	1	3	3	2	3	1
169	2018-10-01	Clinic	3	1	1	1	3	2	12	1	2	3	1	2	2	4	4	4	1	4	3	1	1	2	2	2	2	2	2	2	2	3	3	3	3	3	3	3	3	3	3	3	3	3	2	3	2	3	2
170	2018-10-01	Clinic	2	1	1	1	4	2	4	1	2	3	1	2	2	4	4	4	1	4	1	3	3	2	2	2	2	2	2	2	2	3	3	3	3	3	3	3	3	3	3	3	3	3	3	3	2	3	2
171	2018-10-01	Clinic	2	1	1	1	4	2	9	4	2	3	1	2	2	4	4	4	1	4	3	3	3	2	2	2	2	2	2	2	2	3	3	3	3	3	3	3	3	3	3	3	3	3	2	3	2	3	2
172	2018-10-01	Clinic	3	1	1	1	3	2	22	6	2	3	1	2	2	4	4	4	1	4	1	3	2	2	2	2	2	2	2	2	2	3	3	3	3	3	3	3	3	3	3	3	3	3	3	3	2	3	2
173	2018-10-01	Clinic	1	1	1	1	3	2	1	5	1	3	1	2	4	4	4	4	2	4	2	2	3	2	2	2	2	2	2	2	2	1	2	1	1	1	3	3	3	3	1	1	3	3	2	3	2	1	2
174	2018-10-01	Clinic	2	1	1	1	4	2	10	5	2	3	1	2	4	4	4	4	1	4	2	2	3	2	1	2	2	2	2	2	2	3	3	3	3	3	3	3	3	3	3	3	3	3	3	3	2	3	2
175	2018-10-01	Clinic	3	1	1	3	3	2	19	3	2	3	3	1	1	3	4	4	1	2	2	3	2	1	2	2	2	2	2	2	2	3	3	3	3	3	3	3	3	3	3	3	3	3	3	3	2	3	2
176	2018-10-01	Clinic	2	1	1	1	4	2	6	4	2	3	1	2	2	4	4	1	3	3	3	3	2	2	2	2	2	2	2	2	2	3	3	3	3	3	3	3	3	3	3	3	3	3	2	3	2	3	2
177	2018-10-01	Clinic	2	1	1	1	3	2	26	5	2	3	1	2	2	4	4	4	1	4	1	3	3	2	2	2	2	2	2	2	2	3	3	3	3	3	3	3	3	3	3	3	3	3	3	3	2	3	2
178	2018-10-01	Clinic	2	1	1	1	3	2	29	5	2	3	1	2	2	4	4	4	1	4	2	3	2	2	2	2	2	2	2	2	2	3	3	3	3	3	3	3	3	3	3	3	3	3	2	3	2	3	2
179	2018-10-01	Clinic	2	1	1	1	3	2	35	3	2	3	1	2	2	4	4	4	1	4	2	2	2	2	2	2	2	2	2	2	2	2	3	2	2	3	3	3	3	3	3	3	3	3	3	3	2	3	2
180	2018-10-01	Clinic	3	2	1	1	3	2	8	5	2	3	1	2	2	4	4	4	1	4	2	3	2	2	2	2	2	2	2	2	2	3	3	3	3	3	3	3	3	3	3	3	3	3	3	3	2	3	2
181	2018-10-01	Clinic	2	1	1	1	3	2	25	2	2	3	1	2	2	4	4	4	1	4	4	2	2	2	2	2	2	2	2	2	2	3	3	3	3	3	3	3	3	3	3	3	3	3	2	3	2	3	2
182	2018-10-01	Clinic	2	1	1	1	3	2	1	4	2	3	3	2	2	4	4	4	1	4	4	3	2	2	2	2	2	2	2	2	2	3	3	3	3	3	3	3	3	3	3	3	3	3	3	3	2	3	2
183	2018-10-01	Clinic	2	1	1	1	3	2	26	3	2	3	2	2	2	4	4	4	1	4	4	3	1	2	2	2	2	2	2	2	2	3	3	3	3	3	3	3	3	3	3	3	3	3	3	3	2	3	2
184	2018-10-01	Clinic	1	1	1	1	4	2	3	3	2	3	1	2	2	4	4	4	1	4	2	3	3	2	2	2	2	2	2	2	2	3	3	3	3	3	3	3	3	3	3	3	3	3	2	3	2	3	2
185	2018-10-01	Clinic	2	1	1	1	3	1	18	5	2	3	2	2	2	4	4	4	1	4	4	3	3	2	2	2	2	2	2	2	2	3	3	3	3	3	3	3	3	3	3	3	3	3	2	3	2	3	2
186	2018-10-01	Clinic	2	1	1	1	3	2	17	4	2	3	1	2	2	4	4	4	1	4	4	3	2	2	2	2	2	2	2	2	2	3	3	3	3	3	3	3	3	3	3	3	3	3	2	3	2	3	2
187	2018-10-01	Clinic	2	1	1	1	3	2	20	1	2	2	2	1	2	3	3	3	1	3	1	2	2	2	2	2	2	2	2	2	2	2	3	3	3	3	3	3	3	3	3	3	3	3	2	3	2	3	2
188	2018-10-01	Clinic	1	1	1	1	3	2	5	1	2	3	2	2	3	4	4	4	1	1	2	3	1	2	2	2	2	2	2	2	2	3	3	3	3	3	3	3	3	3	3	3	3	3	2	3	2	3	2
189	2018-10-01	Clinic	2	1	1	1	3	2	21	4	2	2	3	1	2	4	4	4	1	4	1	3	1	2	2	2	2	2	2	2	2	3	3	3	3	3	3	3	3	3	3	3	3	3	2	3	2	3	2
190	2018-10-01	Clinic	3	1	1	1	3	2	15	5	2	3	1	2	2	4	4	4	1	3	2	3	3	2	2	2	2	2	2	2	2	3	3	3	3	3	3	3	3	3	3	3	3	3	2	3	2	3	2
